1 **Title:** Signatures of selection at drug resistance loci in *Mycobacterium tuberculosis*

2 **Authors:** Tatum D. Mortimer<sup>1</sup>, Alexandra M. Weber<sup>1</sup>, Caitlin S. Pepperell<sup>1\*</sup>

3 <sup>1</sup> Department of Medicine, Division of Infectious Diseases and Department of Medical  
4 Microbiology and Immunology, University of Wisconsin-Madison

5 \*Address correspondence to Caitlin S. Pepperell, [cspepper@medicine.wisc.edu](mailto:cspepper@medicine.wisc.edu)

6 Running title: Selection at drug resistance loci in *M. tb*

7

8 Word counts:

9 Abstract- 250

10 Importance- 134

11 Main Text- 5,560

12

13 **Abstract:**

14 Tuberculosis (TB) is the leading cause of death by an infectious disease, and global TB  
15 control efforts are increasingly threatened by drug resistance in *Mycobacterium*  
16 *tuberculosis* (*M. tb*). Unlike most bacteria, where lateral gene transfer is an important  
17 mechanism of resistance acquisition, resistant *M. tb* arises solely by *de novo*  
18 chromosomal mutation. Using whole genome sequencing data from two natural  
19 populations of *M. tb*, we characterized the population genetics of known drug resistance  
20 loci using measures of diversity, population differentiation, and convergent evolution.  
21 We found resistant sub-populations to be less diverse than susceptible sub-populations,  
22 consistent with ongoing transmission of resistant *M. tb*. A subset of resistance genes  
23 (“sloppy targets”) were characterized by high diversity and multiple rare variants; we  
24 posit that a large genetic target for resistance and relaxation of purifying selection  
25 contribute to high diversity at these loci. For “tight targets” of selection, the path to  
26 resistance appeared narrower, evidenced by single favored mutations that arose  
27 numerous times on the phylogeny and segregated at markedly different frequencies in  
28 resistant and susceptible sub-populations. These results suggest that diverse genetic  
29 architectures underlie drug resistance in *M. tb*, and combined approaches are needed  
30 to identify causal mutations. Extrapolating from patterns observed in well-characterized  
31 genes, we identified novel candidate variants involved in resistance. The approach  
32 outlined here can be extended to identify resistance variants for new drugs, to  
33 investigate the genetic architecture of resistance, and, when phenotypic data are  
34 available, to find candidate genetic loci underlying other positively selected traits in  
35 clonal bacteria.

36 **Importance:**

37 *Mycobacterium tuberculosis* (*M. tb*), the causative agent of tuberculosis (TB), is a  
38 significant burden on global health. Antibiotic treatment imposes strong selective  
39 pressure on *M. tb* populations. Identifying the mutations that cause drug resistance in  
40 *M. tb* is important for guiding TB treatment and halting the spread of drug resistance.  
41 Whole genome sequencing (WGS) of *M. tb* isolates can be used to identify novel  
42 mutations mediating drug resistance and to predict resistance patterns faster than

43 traditional methods of drug susceptibility testing. We have used WGS from natural  
44 populations of drug resistant *M. tb* to characterize effects of selection for advantageous  
45 mutations on patterns of diversity at genes involved in drug resistance. The methods  
46 developed here can be used to identify novel advantageous mutations, including new  
47 resistance loci, in *M. tb* and other clonal pathogens.

48

49 **Introduction:**

50 *Mycobacterium tuberculosis* (*M. tb*), the causative agent of tuberculosis (TB), is  
51 estimated to have caused 1.4 million deaths in 2015, making it the leading cause of  
52 death due to an infectious disease. The proportion of TB due to MDR (multi-drug  
53 resistant) *M. tb* resistant to first line anti-tuberculosis drugs isoniazid (INH) and rifampin  
54 (RIF)) is increasing (1), which poses a major threat to global public health. Unlike most  
55 bacteria, *M. tb* evolves clonally, so resistance cannot be transferred among strains or  
56 acquired from other species of bacteria: drug resistance in *M. tb* results from *de novo*  
57 mutation within patients and transmission of drug resistant clones (2–4). The relative  
58 contributions of *de novo* emergence and transmitted drug resistance varies across  
59 sampling locations (5–9). Another potential variable in the emergence of drug resistant  
60 TB is *M.tb*'s lineage structure: seven distinct lineages have been identified among  
61 globally extant populations of *M. tb*. Among these, lineage 2 (L2) has been associated  
62 with relatively high rates of drug resistance, and it has been postulated that the  
63 acquisition of resistance is a result of higher rates of mutation in this lineage (10).  
64 Studies of *M.tb* evolution within hosts with TB have shown that emergence of drug  
65 resistance is associated with clonal replacements that lead to reductions in genetic  
66 diversity of the bacterial population (11, 12).

67 Many of the methods developed to identify advantageous mutations, such as those  
68 conferring antibiotic resistance, depend on recombination to differentiate target loci from  
69 neutral variants (13). However, in clonal organisms like *M. tb*, neutral and deleterious  
70 mutations that are linked to advantageous variants will evolve in tandem with them.  
71 This linkage among sites can also cause competition between genetic backgrounds with  
72 beneficial mutations, decreasing the rate of fixation for beneficial alleles, while  
73 deleterious alleles are purged less efficiently (14–16).

74 While the majority of the *M. tb* genome is subject to purifying selection (i.e. selection  
75 against deleterious mutations) (3), antibiotic pressure exerts strong selection for  
76 advantageous variants that confer resistance. *M. tb* drug resistance has been the focus  
77 of extensive investigation, and a variety of resistance mutations have been  
78 characterized for commonly used anti-tuberculosis drugs (17). Drug resistance

79 mutations can be associated with fitness costs (18–20), and compensatory mutations  
80 that ameliorate these fitness costs have been identified in the context of rifampicin  
81 resistance (21, 22). Resistance mutations found to have lower fitness costs *in vitro* - as  
82 measured by competition assays - are found at higher frequencies among *M. tb* clinical  
83 isolates and appear to be transmitted at higher rates relative to mutations with high *in*  
84 *vitro* fitness costs (18, 23). Candidate loci involved in resistance and compensation for  
85 its fitness effects have been identified previously by screening for homoplastic variants  
86 (i.e. mutations that emerge more than once on the phylogeny) that are significantly  
87 associated with drug resistant phenotypes (24) and genes with higher  $dN/dS$  (ratio of  
88 non-synonymous versus synonymous mutations) in resistant compared to sensitive  
89 isolates (25). Application of these methods to whole genome sequence data from *M. tb*  
90 clinical isolates has recovered known drug resistance loci, as well as loci associated  
91 with cell surface lipids and biosynthesis, DNA replication, and metabolism.

92 The goal of the present study was to use patterns of genetic diversity at known drug  
93 resistance loci to identify the population genomic signatures of positive selection in  
94 natural populations of *M. tb*. Using whole genome sequence data from two populations  
95 for which phenotypic resistance data were available, we have identified several distinct  
96 signatures associated with these loci under selection. Based on these results, we  
97 propose methods of identifying loci under positive selection, including novel drug  
98 resistance loci, in clonal bacteria such as *M. tb*.

## 99 **Results:**

100 We inferred the phylogeny of 1161 *M. tb* isolates from Russia and South Africa (see  
101 Methods, Supplementary Table 1) using the approximate maximum likelihood method  
102 implemented in FastTree2 (Figure 1). The majority of the isolates belong to L2 ( $n = 667$ )  
103 and L4 ( $n = 481$ ). *M. tb* nucleotide diversity was similar to previous estimates from a  
104 globally distributed sample (26). We identified lineage-specific patterns in overall  
105 diversity, with L4 having higher diversity than L2 ( $\pi_{L2}$ :  $3.6 \times 10^{-5}$ ,  $\pi_{L4}$ :  $1.5 \times 10^{-4}$ ).  
106 Previously published analyses of whole genome sequence data from L2 indicate that  
107 the majority of L2 isolates worldwide belong to a sub-lineage that has undergone  
108 relatively recent expansion (27, 28). In this sample from Russia and South Africa, the

109 majority of L2 isolates belong to this sub-lineage, while the L4 isolates are associated  
110 with deeper branching sub-lineages. This likely contributes to the observed differences  
111 in diversity.

112 Overall diversity of L2 was lower than L4 in our sample (Figure 2,  $p < 2.2 \times 10^{-16}$ ).  
113 Seven hundred and sixty two of the isolates in our sample (66%) are resistant to one or  
114 more anti-tuberculosis drugs (Table 1).

115 Drug resistant TB can be acquired as a result of *de novo* mutations within a patient or  
116 by infection with a resistant strain. When resistance is primarily mediated by *de novo*  
117 mutations, diversity should be similar in susceptible and resistant populations as  
118 resistance will arise on multiple genetic backgrounds. By contrast, if resistance  
119 develops primarily *via* transmission of resistant strains, the resistant sub-population  
120 should be less diverse than the susceptible sub-population. We compared the  
121 nucleotide diversity of susceptible and resistant sub-populations and found genome  
122 wide estimates of nucleotide diversity to be higher in isolates susceptible to a range of  
123 drugs for which phenotyping data were available (paired t-test,  $p = 0.029$ ). In  
124 comparisons of gene-wise diversity in susceptible and resistant populations, we found  
125 that resistant isolates had a greater number of genes with no diversity, but levels of  
126 diversity within genes in which it was measurable were similar between resistant and  
127 susceptible populations (Figure 3).

128 Of the 3,162 genes included in our analyses, 109 (3%) were invariant across all isolates  
129 in our sample. This is likely due to strong purifying selection on these genes. An  
130 additional 136 genes harbored variation in the drug susceptible populations but were  
131 invariant across all of the drug resistant populations. We did not observe the converse,  
132 i.e. genes that were invariant in susceptible isolates specifically, which supports the  
133 conclusion from genome wide diversity estimates that resistant isolates represent a  
134 subset of the diversity found in susceptible populations and suggests that there may be  
135 purifying selection that is specific to the setting of drug resistance. In order to evaluate  
136 whether the observed pattern was likely to arise by chance, we performed weighted  
137 random sampling of genes. The weighting was based on diversity in susceptible  
138 populations, assuming that genes with low diversity in susceptible populations are more

139 likely to be invariant in resistant populations. After randomly sampling genes in each  
140 drug resistant population 1000 times, we found that no samples contained shared  
141 genes amongst all resistant populations (first and second line drugs). This suggests that  
142 specific genes tend to lose diversity in the setting of drug resistance, which could result  
143 from purifying selection specific to this setting. A potentially important caveat is that in  
144 our data set, drug resistant populations are not independent and the same isolates are  
145 often resistant to multiple drugs. Since resistance to second line drugs frequently arises  
146 on genetic backgrounds already resistant to one or more first line drugs, we repeated  
147 the sampling with only first line drugs and found that the maximum number of sampled  
148 genes shared across all populations was 2 (median 0). Overall, these results suggest  
149 that certain genes are more likely to lose diversity as drug resistance evolves, but we  
150 cannot completely rule out the possibility that the pattern arose as a result of  
151 overlapping membership in resistant populations.

152 We compared diversity of drug resistance associated genes (Table 2) with the rest of  
153 the genome using two measures of diversity: average pairwise differences ( $\pi$ ) and  
154 number of segregating sites ( $\theta$ ). We found the resistance genes *gid*, *rpsL*, and *pncA* to  
155 be in the top 5<sup>th</sup> percentile of gene-wise  $\pi$  and/or  $\theta$  values. *rrs* and *ethA* are in the top  
156 5<sup>th</sup> percentile of  $\theta$ , but not  $\pi$ . Surprisingly, despite being a target of multiple drug  
157 resistance mutations (Table 2), we did not identify extreme levels of diversity in *katG*  
158 (80<sup>th</sup> and 82<sup>nd</sup> percentile of  $\pi$  and  $\theta$ , respectively).

159 We also examined gene-wise diversity values within each lineage to look for lineage  
160 specific high diversity genes. In both L2 and L4, *gid*, *rpsL*, *pncA*, *ethA*, and *thyA* were in  
161 the top 5<sup>th</sup> percentile of diversity ( $\pi$  and/or  $\theta$ ). In L2, *rpoB*, *embB*, *Rv1772*, and *folC*  
162 were additionally in the top 5<sup>th</sup> percentile of gene-wise  $\pi$  and/or  $\theta$  values. In L4, *Rv0340*  
163 was in the top 5<sup>th</sup> percentile of gene-wise  $\pi$  and/or  $\theta$ . While *rpoB* and *embB* were not in  
164 the top 5<sup>th</sup> percentile of gene-wise  $\theta$  in L4, they still had high diversity (91<sup>st</sup> and 82<sup>nd</sup>  
165 percentile, respectively). The lineage specific differences in diversity of *Rv1772*, *folC*,  
166 and *Rv0340* suggest that there are interactions between these loci and loci that  
167 differentiate L2 and L4.

168 We used gene-wise estimates of Tajima's D to investigate gene specific skews in the  
169 site frequency spectrum that could result from selection, where negative values indicate  
170 an excess of rare variants and positive values indicate an excess of intermediate  
171 frequency variants. We previously identified a relationship between gene length and  
172 gene-wise estimates of Tajima's D for *M. tb* (26), and this finding was corroborated here  
173 ( $R^2 = 0.3$  after  $\log_2$  transformation). In order to identify genes with extreme values of  
174 Tajima's D - out of proportion with their length - we performed linear regression on  $\log_2$   
175 transformed gene lengths and Tajima's D values and identified genes with the largest  
176 residuals (Figure 4). *pncA*, *ethA*, and *embC* all had Tajima's D values lower than  
177 expected based on their length (5<sup>th</sup> percentile of residual values). This indicates that  
178 these genes contain an excess of rare variants compared to other genes in the genome.  
179 Excess rare variants can result from a population expansion, a selective sweep, or  
180 purifying selection.

181 We calculated the ratio of  $\pi$  and  $\theta$  of resistance associated genes in isolates  
182 susceptible and resistant to first line drugs and identified genes with markedly different  
183 diversities in resistant and susceptible sub-populations (Figure 5A). Among resistance  
184 genes in the top 5<sup>th</sup> percentile of gene-wise  $\pi$  and  $\theta$  overall, diversity of *pncA* and *ethA*  
185 is relatively high among resistant isolates, whereas diversity of *gid* is similar in resistant  
186 and susceptible populations. We also examined differences in this ratio between  
187 isolates in L2 and L4 (Figure 5B). *Rv1772* and *embR* were more diverse in resistant  
188 isolates in L2, and *kasA* and *tlyA* were more diverse in resistant isolates in L4.

189 We used  $F_{ST}$  outlier analysis to identify single nucleotide polymorphisms (SNPs) and  
190 indels that exhibited extreme differences in frequency between susceptible and resistant  
191 populations. Our *a priori* expectation was that variants mediating resistance would be at  
192 markedly higher frequency in the drug resistant sub-population and that drug targets  
193 would be enriched among genes harboring variants with high  $F_{ST}$ . After removing SNPs  
194 in regions corresponding to indels and variants at sites missing data for greater than 5%  
195 of isolates, the highest  $F_{ST}$  SNPs in comparisons of resistant and susceptible sub-  
196 populations to first line drugs are in *katG* (2155168,  $F_{ST} = 0.89$ , INH), *rpoB* (761155,  $F_{ST}$   
197 = 0.72, RIF), and *rpsL* (781687,  $F_{ST} = 0.37$ , streptomycin (STR)). These SNPs were also



198  $F_{ST}$  outliers in the lineage specific analyses. We used a randomization procedure to  
199 assess the significance of observed  $F_{ST}$  values and found the maximum  $F_{ST}$  values after  
200 randomly assigning resistant and susceptible designations to be 0.023 for INH, 0.019  
201 for RIF, and 0.018 for STR. In addition to SNPs within known drug resistance  
202 associated genes, we identified  $F_{ST}$  outliers in genes that may be novel targets for drug  
203 resistance (Table 3).

204 Homoplastic SNPs – i.e. SNPs that evolve more than once on a phylogeny – are  
205 candidate loci under positive selection and have previously been used to identify  
206 resistance associated mutations in *M. tb* (24). Of the 235 genes with homoplastic SNPs  
207 that we identified in our sample, 13 are known to be associated with drug resistance  
208 (Figure 6), and resistance genes were significantly enriched among genes with  
209 homoplastic SNPs (Fisher's Exact Test,  $p = 1.2 \times 10^{-4}$ ). *pncA* had the largest number of  
210 homoplastic SNPs of any gene in the genome ( $n = 27$  distinct SNPs that appear  $> 1$  on  
211 the phylogeny). The SNPs identified in  $F_{ST}$  analysis were also identified as homoplastic  
212 (Figure 6). Our results suggest that complementary approaches based on homoplasy  
213 and  $F_{ST}$  outlier analysis can be used to identify SNPs associated with a trait of interest  
214 (in this case drug resistance). In addition to genic SNPs, we observed homoplastic  
215 SNPs that are also  $F_{ST}$  outliers in intergenic regions upstream of drug resistance  
216 associated genes (Table 3). These are candidate resistance and compensatory  
217 mutations with a regulatory mechanism of action.

218 In our analyses of indels, we controlled for the possibility that indels affecting the same  
219 gene may not be called in exactly the same position by considering indels within the  
220 same gene as identical. We identified four drug resistance associated genes with  
221 homoplastic indels: *gid*, *ethA*, *rpoB*, and *pncA*.  $F_{ST}$  values for the deletion in *gid* were in  
222 the top 5<sup>th</sup> percentile for capreomycin (CAP), ethambutol (EMB), ethionamide (Et),  
223 kanamycin (K), ofloxacin (OFL), and pyrazinamide (PZA) resistant populations, but,  
224 interestingly, the deletion was not associated with STR resistance ( $F_{ST} = 0.04$ ). Unlike  
225 homoplastic SNPs, homoplastic indels were not significantly enriched for drug  
226 resistance associated loci ( $p = 1$ ).

227 We recovered 20 out of 40 known drug targets by identifying genes with extreme values  
228 of diversity, homoplastic SNPs, or SNPs that are  $F_{ST}$  outliers in comparisons of resistant  
229 and susceptible subpopulations. All genes with both extremely high diversity (top 5<sup>th</sup>  
230 percentile) and homoplastic mutations were drug resistance associated (i.e. *gid*, *ethA*,  
231 *pncA*, and *rpsL*). We identified 67 genes with high diversity and Tajima's D values more  
232 negative than expected based on gene length; only two of these were associated with  
233 drug resistance (i.e. *ethA* and *pncA*). Twenty out of 51 homoplastic SNPs that are also  
234  $F_{ST}$  outliers fall within or upstream of known drug resistance associated genes. The  
235 remaining SNPs may be false positives or novel drug resistance mutations.

## 236 **Discussion:**

237 Highly virulent bacterial pathogens such as *M. tb*, *Yersinia pestis* (29), *Francisella*  
238 *tularensis* (30), and *Mycobacterium ulcerans* (31) appear to evolve clonally, i.e. with  
239 little to no evidence of lateral gene transfer. It is important to identify advantageous  
240 mutations in these and other organisms, as they are likely to be associated with  
241 phenotypes such as drug resistance, heightened transmissibility, or host adaptation.  
242 However, few methods are available for identifying loci under positive selection in the  
243 setting of clonal evolution. We adopted an empirical approach to this problem and used  
244 natural population data to characterize patterns of diversity at loci known to be under  
245 positive selection in *M. tb*.

246 In this analysis of clinical isolates from settings with endemic drug resistance, we found  
247 genome-wide diversity to be higher in susceptible *M. tb* sub-populations than in those  
248 resistant to first- and second- line drugs (with the exception of protionamide (PRO) and  
249 moxifloxacin (MOX) resistant populations). The observation of higher diversity in drug  
250 susceptible populations is consistent with a significant role for transmitted resistance in  
251 the propagation of drug resistant *M. tb*. A recent study of extensively drug resistant  
252 (XDR) *M. tb* infection in South Africa concluded that XDR cases result primarily from  
253 transmission of resistance, rather than *de novo* evolution of resistance mutations during  
254 infection (9). The primary studies for the sequence data analyzed here also identified  
255 clusters of drug resistant isolates (5, 6), suggesting that resistant isolates were being  
256 transmitted. Our results, along with these previously published observations, suggest

257 that the fitness of drug resistant isolates can be high enough to allow them to circulate  
258 in endemic regions. As discussed below, the fitness effects of *M. tb* drug resistance  
259 mutations appear to vary substantially; the finding of transmitted resistance in this and  
260 other studies suggests that the fitness of isolates harboring low-cost mutations is  
261 comparable to that of susceptible *M. tb*. The populations in our study have a high  
262 burden of drug resistant TB, and the role of transmitted drug resistance may differ in  
263 other settings.

264 An alternative – but not mutually exclusive – explanation for the observation of higher  
265 diversity in susceptible populations is that drug resistant *M. tb* is under distinct  
266 evolutionary constraints that reduce average genome-wide levels of diversity. In support  
267 of this hypothesis, we identified a specific subset of genes that were invariant across  
268 drug resistant populations. Interestingly, while average diversity was lower for resistant  
269 sub-populations, the gene-wise diversity distributions had heavier tails, indicating there  
270 were more genes with extreme levels of diversity.

271

272 We found the genetic architecture of resistance to vary among targets, and resistance-  
273 associated genes tended to fall within categories that we term “sloppy”, “tight”, and  
274 “hybrid” targets of selection (the latter has a combination of tight and sloppy features  
275 and applies to *rpsL*, *embB*, and *rpoB*). “Sloppy” resistance genes are characterized by  
276 high levels of diversity. Genes associated with PZA, EMB, Et, and STR resistance (i.e.  
277 *pncA*, *gid*, *rpsL*, *rrs*, *ethA*) have high levels of diversity; some also had an excess of rare  
278 variants (*pncA*, *ethA*, *embC*). The finding that these genes accumulate multiple,  
279 individually rare mutations implies that there is a large target for resistance and/or  
280 compensatory mutations within the gene: that is, resistance can result from multiple  
281 different variants acting individually or in concert. In addition to its numerous rare  
282 mutations, *pncA* also contains the highest number of homoplastic SNPs (27 SNPs  
283 emerged more than once on the phylogeny) of any gene in the data set. Among the 62  
284 non-synonymous *pncA* mutations in our dataset, 55 have been previously reported in  
285 association with drug resistance (TB Drug Resistance Mutation Database (32)). The  
286 newly described SNPs may mediate drug resistance or compensation for the fitness

287 effects of other variants. Relaxed purifying selection is likely to play a role in concert  
288 with selection for diverse advantageous resistance mutations in the accumulation of  
289 diversity in *pncA* and other sloppy targets. The fact that numerous mutations are  
290 segregating in a natural population suggests that alterations to these genes are  
291 generally associated with negligible fitness costs. An *M. tb* strain harboring a deletion in  
292 *pncA* conferring resistance to PZA was estimated to be endemic in Quebec by 1800,  
293 long before the use of PZA for the treatment of TB (33–35). This supports the idea that  
294 purifying selection on *pncA* is relatively weak, which would contribute to its exceedingly  
295 high diversity and broaden the adaptive paths to resistance.

296 In contrast to *pncA*, *gid*, which is associated with low level STR resistance (36), does  
297 not appear to have the signatures of a “sloppy” target for resistance despite its high  
298 diversity. We identified just three homoplastic SNPs within *gid*, and previous studies  
299 have found that STR resistant isolates do not encode the same *gid* mutations (37). This  
300 could indicate that a multitude of mutations within *gid* confer resistance, but levels of  
301 diversity in the gene were similar in resistant and susceptible isolates. Previous studies  
302 of sequence polymorphism in *gid* have identified high diversity in this gene in both  
303 resistant and susceptible isolates (37–39): *gid* appears to be subject to relaxed purifying  
304 selection in the presence and absence of antibiotic pressure. Since *gid* mutations confer  
305 low level resistance, it’s also possible that mis-classification of resistance phenotypes  
306 contributed to the lack of differentiation we and others have observed between  
307 putatively STR resistant and susceptible sub-populations. In addition, mutations in *rpsL*,  
308 which cause high level resistance, could mask the contribution of *gid* to STR resistance.

309 We found some drug targets to be highly diverse in resistant sub-populations of either  
310 L2 or L4 (but not both), suggesting that resistance mutations in these genes interact  
311 with the genetic background; the fitness effects of mutations in these genes could, for  
312 example, vary on different genetic backgrounds. Lineage-specific  $F_{ST}$  outliers are  
313 another category of candidate locus with lineage dependent roles in drug resistance  
314 (Table 3). Epistatic interactions between drug resistance mutations and *M. tb* lineage  
315 have been reported previously: for example, specific mutations in the *inhA* promoter  
316 have been associated with the L1 and *M. africanum* genetic backgrounds (40, 41).

317 In contrast to “sloppy” targets, we discovered individual homoplastic SNPs associated  
318 with drug resistant sub-populations (i.e. with high  $F_{ST}$ ) representing “tight” targets of  
319 selection in genes conferring resistance to INH, RIF, and STR. Numerous resistance  
320 mutations have been described in *katG*, *rpoB*, *rpsL*, *embB*, and *gyrA*, but we find drug  
321 resistant sub-populations to be defined by a specific subset of mutations in these genes.  
322 This suggests that certain mutations are strongly favored relative to others conferring  
323 resistance to the same drugs when *M. tb* is in its natural environment. Antibiotic  
324 resistance can impose fitness costs on *M. tb* during *in vitro* growth, with the range of  
325 fitness costs varying among mutations, even within the same gene (18). Mutations can  
326 also have different fitness effects depending on the genetic background, but the most fit  
327 mutants were the same across *M. tb* lineages in a study of RIF resistance (18).

328 In our analyses, we found the dominant INH resistance mutation in *katG* to affect the  
329 serine at position 315. This change reduces affinity to INH but preserves catalase  
330 activity (42) and is associated with lower fitness costs than other *katG* mutants, both *in*  
331 *vitro* and in a mouse model (43, 44). This mutation was recently shown to precede  
332 mutations conferring resistance to other drugs during accumulation of resistance in  
333 evolution of multi-drug resistant *M. tb* (45). The dominant mutations we identified in  
334 *rpoB* (codon 450) and *rpsL* (codon 43) have also been found to have lower fitness costs  
335 *in vitro* compared to other mutations conferring resistance to RIF and STR in these  
336 genes (18, 44, 46). These results suggest that many of the findings regarding the  
337 relative fitness costs of *M. tb* resistance mutations *in vitro* and in animal models are  
338 relevant to the pathogen’s natural environment.

339 The fitness effects of mutations in *gyrA* (codon 94) and *embB* (codon 306) have not  
340 been measured; based on our homoplasmy and  $F_{ST}$  results, we propose that they have  
341 lower fitness costs than other mutations in these genes and that they represent “tight”  
342 targets of selection. Mutations at *gyrA* codon 94 were previously found to be the most  
343 prevalent in a survey of *gyrA* and *gyrB* mutations in fluoroquinolone resistant *M. tb*  
344 clinical isolates (47). Interestingly, the mutation in *embB* codon 306 has been previously  
345 associated with acquisition of multiple resistances (48), and we find that this position is  
346 an  $F_{ST}$  outlier for all first line drugs in L4. This mutation is not an  $F_{ST}$  outlier in L2 (i.e top

347 5<sup>th</sup> percentile), with percentiles for  $F_{ST}$  values ranging from 0.07-0.68 for first line drugs  
348 in this lineage. These observations suggest that the genetic background affects  
349 interactions among resistance mutations, and that *embB* 306 is important for acquisition  
350 of multidrug resistance in L4 but not L2.

351 We searched for indels with the signature of a “tight” target, i.e. homoplastic mutations  
352 segregating at markedly different frequencies in drug susceptible and resistant sub-  
353 populations. Unlike the pattern observed with SNPs, genes associated with drug  
354 resistance were not significantly enriched among those harboring homoplastic indels.  
355 We identified one homoplastic indel that was also an  $F_{ST}$  outlier - a deletion in *gid* that  
356 causes a frameshift. Patterns of variation in *gid* are complex and suggest a role for  
357 relaxation of purifying selection (i.e. in the accumulation of excess SNPs in both  
358 resistant and susceptible isolates) and perhaps a tight target associated with multi-  
359 resistance (i.e. this homoplastic/ $F_{ST}$  outlier deletion that was associated with resistance  
360 to CAP, EMB, Et, K, OFL, and PZA).

361 Our finding that, save for the frameshift mutation in *gid*, indels in resistance genes do  
362 not have the signature of “tight” targets suggests that they are generally associated with  
363 higher fitness costs than SNPs. Fifteen drug targets have been found in transposon  
364 mutagenesis experiments to be essential for *M. tb* growth *in vitro*, including *rpoB* and  
365 *rpsL*; deletions in these genes are likely to interrupt important functions (49). Deletions  
366 in non-essential genes could also have fitness costs. Deletions in *katG*, which is non-  
367 essential, can result in INH resistance but they are not observed as frequently in clinical  
368 isolates as the KatG S315 SNP, particularly among transmitted INH-resistant strains  
369 (23).

370 There are several limitations to our study. Resistance to multiple drugs was common in  
371 our sample, and in some cases it was difficult to identify patterns of diversity and  
372 population differentiation that were specific to individual drugs. Our results are also  
373 limited by the accuracy with which drug resistance phenotypes were determined and a  
374 lack of phenotypic data for some drugs (particularly second line drugs). Our sample  
375 was heavily skewed to lineages 2 and 4, and the results are not necessarily applicable  
376 to other *M. tb* lineages. Finally, the data analyzed here were generated with short



377 sequencing read technologies, and we were thus limited to characterizing diversity in  
378 regions of the *M. tb* genome that can be resolved with these methods: regions that were  
379 masked from analysis (e.g. due to sequence repeats) may include unknown resistance  
380 targets. We also used an L4 genome (H37Rv) as a reference, and gene content specific  
381 to L2 may not have been identified.

382 We were not able to recover all drug resistance associated genes using the analyses  
383 performed here. This is likely a result of limited phenotypic data for some drugs and  
384 their associated targets (e.g. *thyA* and *folC*, which are associated with aminosalicylic  
385 acid (PAS) resistance). Our list of drug targets was dominated by genes associated with  
386 INH resistance, and signatures in genes that harbor rare resistance associated alleles  
387 may be subtle compared to the KatG S315 mutation found at high frequency in drug  
388 resistant populations.

389 We identified 31 SNPs that do not fall within the list of known drug resistance genes,  
390 which both emerged more than once on the phylogeny (homoplasies) and were  
391 segregating at markedly different frequencies in resistant and susceptible sub-  
392 populations ( $F_{ST}$  outliers). These SNPs may be novel resistance determinants; notably,  
393 all non-synonymous SNPs within this group are in genes linked with drug resistance in  
394 other studies (i.e. they are in genes encoding efflux pumps, genes differentially  
395 regulated in resistant isolates or in response to the presence of drug, potential drug  
396 targets, or genes in the same pathways as drug targets or resistance determinants)  
397 (50–54). In addition to a direct, previously unrecognized role in resistance, these SNPs  
398 could compensate for fitness costs of drug resistance. For example, we identified a  
399 homoplastic  $F_{ST}$  outlier in *rpoC*, and mutations in *rpoC* have been shown to compensate  
400 for RIF resistance in experimental evolution studies (22).

401 Intriguingly, we found lipid metabolism genes to be enriched in the list of genes  
402 harboring homoplastic SNPs ( $p = 0.013$ ). We've previously shown that these genes  
403 have extreme values of diversity in a global sample of *M. tb* isolates and within  
404 individual hosts (26), suggesting that lipid metabolism genes may also be under positive  
405 selection in *M. tb* populations. The results presented here could be extended by

406 phenotypic characterization of lipid profiles and identification of homoplastic variants  
407 that are at markedly different frequencies in isolates with distinct lipid profiles.

408

409 Here we have used drug resistance loci in *M. tb* to identify the signatures of positive  
410 selection in a clonal bacterium. We found these loci to be associated with distinct  
411 patterns of diversity that likely reflect differing genetic architectures underlying the traits  
412 under selection. The evolutionary path to resistance is broad for some drugs with  
413 “sloppy targets”, whereas for drugs with “tight targets” the means of acquiring resistance  
414 appear more limited. This is likely due to fitness effects of resistance mutations in *M.*  
415 *tb*'s natural environment, as numerous resistance mutations have been identified in tight  
416 target genes. We also found evidence suggesting that there are important interactions  
417 among loci during the evolution of resistance. Our results suggest that purifying  
418 selection on a subset of genes intensifies in the setting of resistance, which could reflect  
419 epistatic interactions and/or a response to the metabolic milieu imposed by  
420 antimycobacterial agents. The results presented here can be used to create more  
421 realistic models of resistance evolution in *M. tb* and to develop novel strategies of  
422 preventing or mitigating the acquisition of resistance. For example, the narrow path to  
423 resistance for drugs with tight targets reveals potentially exploitable vulnerabilities, as  
424 does the finding of interdependencies among specific loci and the genetic background  
425 in the evolution of resistance and multi-resistance. As new TB drugs become available  
426 for clinical use, the approach outlined here can be extended to investigate their  
427 architectures of resistance.

428 Efforts are underway to sequence and perform drug susceptibility testing on thousands  
429 of *M. tb* isolates with the goal of creating an exhaustive catalogue of drug resistance  
430 mutations and eventually using WGS to diagnose drug resistance in clinical settings  
431 (CRyPTIC project, <http://modmedmicro.nsms.ox.ac.uk/cryptic/>, last accessed: May 24,  
432 2017). We found that loci under positive selection can be identified using relatively  
433 simple methods: “tight” targets are highly differentiated in their allele frequencies across  
434 phenotypic groups (i.e.  $F_{ST}$  outliers) and appear as homoplasies on the phylogeny;  
435 “sloppy” targets are characterized by high diversity and/or low Tajima's  $D$ , as well as



436 homoplasies. Extrapolating from patterns observed among known resistance variants,  
437 we have discovered new candidate regulatory and genic resistance variants. The  
438 methods used in this study are widely available and should scale to analysis of the large  
439 collections of genomic and phenotypic data that are currently being generated. This  
440 approach can be extended to identify novel resistance loci in bacteria for which drug  
441 susceptibility phenotypes are defined, as well as other positively selected loci in clonal  
442 bacterial populations.

#### 443 **Methods:**

##### 444 Reference guided assembly

445 We downloaded sequencing read data from two large surveys of drug resistant *M. tb* in  
446 Russia (5) and South Africa (6). We used FastQC (55) and TrimGalore (56) for quality  
447 assessment and adaptor trimming of the reads. Trimmed reads were mapped to *M. tb*  
448 H37Rv (NC\_000962.3) using BWA-MEM v 0.7.12 (57). We used Samtools v 1.2 (58)  
449 and Picard Tools (<https://broadinstitute.github.io/picard/>) for sorting, format conversion,  
450 and addition of read group information. Variants were identified using Pilon v 1.16 (59).  
451 A detailed description of the reference guided assembly pipeline is available at  
452 <https://github.com/pepperell-lab/RGAPepPipe>. We removed isolates with mean  
453 coverage less than 20X, isolates with percentage of the genome covered at 10X less  
454 than 90%, isolates where a majority of reads did not map to H37Rv, and isolates where  
455 greater than 10% of sites were unknown after mapping. The final data set contains 1161  
456 *M. tb* isolates (Supplementary Table 1). The alignment was masked to remove repetitive  
457 regions including PE/PPE genes.

##### 458 Phylogenetic analysis

459 We estimated the approximately maximum likelihood phylogeny using the masked  
460 alignment from reference guided assembly with FastTree-2.1.9 (60). We compiled  
461 FastTree using the double precision option to accurately estimate branch lengths of  
462 closely related isolates. We used FigTree (<http://tree.bio.ed.ac.uk/software/figtree/>) for  
463 tree visualization.

#### 464 SNP annotation

465 A VCF of single nucleotide variants was created from the masked alignment using SNP-  
466 sites v 2.3.2 (61). SNPs were annotated using SnpEff v 4.1j (62) to identify  
467 synonymous, non-synonymous, and intergenic SNPs based on the annotation of *M. tb*  
468 H37Rv.

#### 469 Indel identification

470 Insertions and deletions were identified during variant calling with Pilon. We used Emu  
471 (63) to normalize indels across multiple isolates. We used a presence/absence matrix  
472 for the normalized indels for further analyses of indel diversity.

#### 473 Population genetics statistics

474 Whole genome and gene-wise diversity ( $\pi$  and  $\theta$ ) and neutrality (Tajima's D) statistics  
475 were calculated using Egglib v 2.1.10 (64) for whole genome alignments and gene-wise  
476 alignments. Isolates were further divided by lineage and drug resistance phenotype.  
477 Sites with missing data due to indels or low quality base calls more than 5% of isolates  
478 in the alignment were not included in calculation of statistics. Values of Tajima's D  
479 showed a correlation with gene length in our sample. To find genes with extreme values  
480 of Tajima's D, we performed linear regression in R (65) on log transformed Tajima's D  
481 values and gene length and identified genes with large residual values. To identify  
482 alleles with marked differences in frequency in resistant and susceptible isolates, Weir  
483 and Cockerham's  $F_{ST}$  (66) was calculated using populations of resistant and susceptible  
484 isolates for each drug using vcflib v1.0.0-rc0-262-g50a3 (<https://github.com/vcflib/vcflib>).  
485 For non-biallelic SNPs, we calculated  $F_{ST}$  for the two most common variants.

#### 486 Homoplasy

487 We used TreeTime (67) to perform ancestral reconstruction and place SNPs and indels  
488 on the phylogeny. We identified homoplastic SNPs and indels as those arising multiple  
489 times on the phylogeny.

#### 490 Data availability

491 Unless otherwise noted, all data and scripts associated with this study are available at  
492 <https://github.com/pepperell-lab/mtbDrugResistance>.

493

494 **Funding information:**

495 This material is based upon work supported by the National Science Foundation  
496 Graduate Research Fellowship Program under Grant No. DGE-1256259 to TDM. Any  
497 opinions, findings, and conclusions or recommendations expressed in this material are  
498 those of the author(s) and do not necessarily reflect the views of the National Science  
499 Foundation. TDM is also supported by National Institutes of Health National Research  
500 Service Award (T32 GM07215). CSP is supported by National Institutes of Health  
501 (R01AI113287). Funding for this project was provided by the University of Wisconsin  
502 Madison School of Medicine and Public Health from the Wisconsin Partnership  
503 Program.

504 **Acknowledgments:**

505 We thank members of the Pepperell Lab for their input on analyses and data  
506 visualization.

507

508 **References:**

- 509 1. World Health Organization. 2016. Global tuberculosis report 2016.
- 510 2. Supply P, Warren RM, Bañuls A-L, Lesjean S, Van Der Spuy GD, Lewis L-A, Tibayrenc M,  
511 Van Helden PD, Locht C. 2003. Linkage disequilibrium between minisatellite loci supports  
512 clonal evolution of *Mycobacterium tuberculosis* in a high tuberculosis incidence area. *Mol*  
513 *Microbiol* 47:529–538.
- 514 3. Pepperell CS, Casto AM, Kitchen A, Granka JM, Cornejo OE, Holmes EC, Birren B,  
515 Galagan J, Feldman MW. 2013. The Role of Selection in Shaping Diversity of Natural *M.*  
516 *tuberculosis* Populations. *PLoS Pathog* 9:e1003543.
- 517 4. Eldholm V, Balloux F. 2016. Antimicrobial Resistance in *Mycobacterium tuberculosis*: The  
518 Odd One Out. *Trends Microbiol* 24:637–648.
- 519 5. Casali N, Nikolayevskyy V, Balabanova Y, Harris SR, Ignatyeva O, Kontsevaya I,  
520 Corander J, Bryant J, Parkhill J, Nejentsev S, Horstmann RD, Brown T, Drobniowski F.  
521 2014. Evolution and transmission of drug-resistant tuberculosis in a Russian population.  
522 *Nat Genet* 46:279–286.
- 523 6. Cohen KA, Abeel T, Manson McGuire A, Desjardins CA, Munsamy V, Shea TP, Walker  
524 BJ, Bantubani N, Almeida DV, Alvarado L, Chapman SB, Mvelase NR, Duffy EY,  
525 Fitzgerald MG, Govender P, Gujja S, Hamilton S, Howarth C, Larimer JD, Maharaj K,  
526 Pearson MD, Priest ME, Zeng Q, Padayatchi N, Grosset J, Young SK, Wortman J, Mlisana  
527 KP, O'Donnell MR, Birren BW, Bishai WR, Pym AS, Earl AM. 2015. Evolution of  
528 Extensively Drug-Resistant Tuberculosis over Four Decades: Whole Genome Sequencing  
529 and Dating Analysis of *Mycobacterium tuberculosis* Isolates from KwaZulu-Natal. *PLoS*  
530 *Med* 12:e1001880.
- 531 7. Coscolla M, Barry PM, Oeltmann JE, Koshinsky H, Shaw T, Cilnis M, Posey J, Rose J,  
532 Weber T, Fofanov VY, Gagneux S, Kato-Maeda M, Metcalfe JZ. 2015. Genomic  
533 Epidemiology of Multidrug-resistant *Mycobacterium tuberculosis* During Transcontinental  
534 Spread. *J Infect Dis* jiv025.
- 535 8. Guerra-Assunção JA, Crampin AC, Houben R, Mzembe T, Mallard K, Coll F, Khan P,  
536 Banda L, Chiwaya A, Pereira RPA, McNerney R, Fine PEM, Parkhill J, Clark TG, Glynn  
537 JR. 2015. Large-scale whole genome sequencing of *M. tuberculosis* provides insights into  
538 transmission in a high prevalence area. *eLife* 4:e05166.
- 539 9. Shah NS, Auld SC, Brust JCM, Mathema B, Ismail N, Moodley P, Mlisana K, Allana S,  
540 Campbell A, Mthiyane T, Morris N, Mpangase P, van der Meulen H, Omar SV, Brown TS,  
541 Narechania A, Shaskina E, Kapwata T, Kreiswirth B, Gandhi NR. 2017. Transmission of  
542 Extensively Drug-Resistant Tuberculosis in South Africa. *N Engl J Med* 376:243–253.
- 543 10. Ford CB, Shah RR, Maeda MK, Gagneux S, Murray MB, Cohen T, Johnston JC, Gardy J,  
544 Lipsitch M, Fortune SM. 2013. *Mycobacterium tuberculosis* mutation rate estimates from  
545 different lineages predict substantial differences in the emergence of drug-resistant  
546 tuberculosis. *Nat Genet* 45:784–790.

- 547 11. Eldholm V, Norheim G, von der Lippe B, Kinander W, Dahle UR, Caugant DA, Mannsåker  
548 T, Mengshoel AT, Dyrhol-Riise AM, Balloux F. 2014. Evolution of extensively drug-  
549 resistant *Mycobacterium tuberculosis* from a susceptible ancestor in a single patient.  
550 *Genome Biol* 15:490.
- 551 12. Black PA, Vos M de, Louw GE, Merwe R van der, Dippenaar A, Streicher EM, Abdallah  
552 AM, Sampson SL, Victor TC, Dolby T, Simpson JA, Helden P van, Warren RM, Pain A.  
553 2015. Whole genome sequencing reveals genomic heterogeneity and antibiotic purification  
554 in *Mycobacterium tuberculosis* isolates. *BMC Genomics* 16:857.
- 555 13. Vitti JJ, Grossman SR, Sabeti PC. 2013. Detecting Natural Selection in Genomic Data.  
556 *Annu Rev Genet* 47:97–120.
- 557 14. Hill WG, Robertson A. 1966. The effect of linkage on limits to artificial selection. *Genet*  
558 *Res.*
- 559 15. Felsenstein J. 1974. The Evolutionary Advantage of Recombination. *Genetics* 78:737–756.
- 560 16. Birky CW, Walsh JB. 1988. Effects of linkage on rates of molecular evolution. *Proc Natl*  
561 *Acad Sci* 85:6414–6418.
- 562 17. Silva PEAD, Palomino JC. 2011. Molecular basis and mechanisms of drug resistance in  
563 *Mycobacterium tuberculosis*: classical and new drugs. *J Antimicrob Chemother* 66:1417–  
564 1430.
- 565 18. Gagneux S, Long CD, Small PM, Van T, Schoolnik GK, Bohannan BJM. 2006. The  
566 Competitive Cost of Antibiotic Resistance in *Mycobacterium tuberculosis*. *Science*  
567 312:1944–1946.
- 568 19. Böttger EC, Springer B. 2008. Tuberculosis: drug resistance, fitness, and strategies for  
569 global control. *Eur J Pediatr* 167:141–148.
- 570 20. Strauss OJ, Warren RM, Jordaan A, Streicher EM, Hanekom M, Falmer AA, Albert H,  
571 Trollip A, Hoosain E, Helden PD van, Victor TC. 2008. Spread of a Low-Fitness Drug-  
572 Resistant *Mycobacterium tuberculosis* Strain in a Setting of High Human  
573 Immunodeficiency Virus Prevalence. *J Clin Microbiol* 46:1514–1516.
- 574 21. Brandis G, Wrande M, Liljas L, Hughes D. 2012. Fitness-compensatory mutations in  
575 rifampicin-resistant RNA polymerase. *Mol Microbiol* 85:142–151.
- 576 22. Comas I, Borrell S, Roetzer A, Rose G, Malla B, Kato-Maeda M, Galagan J, Niemann S,  
577 Gagneux S. 2012. Whole-genome sequencing of rifampicin-resistant *Mycobacterium*  
578 *tuberculosis* strains identifies compensatory mutations in RNA polymerase genes. *Nat*  
579 *Genet* 44:106–110.
- 580 23. Gagneux S, Burgos MV, DeRiemer K, Enciso A, Muñoz S, Hopewell PC, Small PM, Pym  
581 AS. 2006. Impact of Bacterial Genetics on the Transmission of Isoniazid-Resistant  
582 *Mycobacterium tuberculosis*. *PLOS Pathog* 2:e61.
- 583 24. Farhat MR, Shapiro BJ, Kieser KJ, Sultana R, Jacobson KR, Victor TC, Warren RM,  
584 Streicher EM, Calver A, Sloutsky A, Kaur D, Posey JE, Plikaytis B, Oggioni MR, Gardy JL,

- 585 Johnstone JC, Rodrigues M, Tang PKC, Kato-Maeda M, Borowsky ML, Muddukrishna B,  
586 Kreiswirth BN, Kurepina N, Galagan J, Gagneux S, Birren B, Rubin EJ, Lander ES, Sabeti  
587 PC, Murray M. 2013. Genomic analysis identifies targets of convergent positive selection in  
588 drug-resistant *Mycobacterium tuberculosis*. Nat Genet advance online publication.
- 589 25. Zhang H, Li D, Zhao L, Fleming J, Lin N, Wang T, Liu Z, Li C, Galwey N, Deng J, Zhou Y,  
590 Zhu Y, Gao Y, Wang T, Wang S, Huang Y, Wang M, Zhong Q, Zhou L, Chen T, Zhou J,  
591 Yang R, Zhu G, Hang H, Zhang J, Li F, Wan K, Wang J, Zhang X-E, Bi L. 2013. Genome  
592 sequencing of 161 *Mycobacterium tuberculosis* isolates from China identifies genes and  
593 intergenic regions associated with drug resistance. Nat Genet advance online publication.
- 594 26. O'Neill MB, Mortimer TD, Pepperell CS. 2015. Diversity of *Mycobacterium tuberculosis*  
595 across Evolutionary Scales. PLoS Pathog 11:e1005257.
- 596 27. Luo T, Comas I, Luo D, Lu B, Wu J, Wei L, Yang C, Liu Q, Gan M, Sun G, Shen X, Liu F,  
597 Gagneux S, Mei J, Lan R, Wan K, Gao Q. 2015. Southern East Asian origin and  
598 coexpansion of *Mycobacterium tuberculosis* Beijing family with Han Chinese. Proc Natl  
599 Acad Sci 112:8136–8141.
- 600 28. O'Neill MB, Kitchen A, Zarley A, Aylward W, Eldholm V, Pepperell CS. 2017. Lineage  
601 specific histories of *Mycobacterium tuberculosis* dispersal in Africa and Eurasia. bioRxiv  
602 210161.
- 603 29. Achtman M, Zurth K, Morelli G, Torrea G, Guiyoule A, Carniel E. 1999. *Yersinia pestis*, the  
604 cause of plague, is a recently emerged clone of *Yersinia pseudotuberculosis*. Proc Natl  
605 Acad Sci 96:14043–14048.
- 606 30. Larsson P, Elfsmark D, Svensson K, Wikström P, Forsman M, Brettin T, Keim P,  
607 Johansson A. 2009. Molecular Evolutionary Consequences of Niche Restriction in  
608 *Francisella tularensis*, a Facultative Intracellular Pathogen. PLoS Pathog 5:e1000472.
- 609 31. Vandellannoote K, Meehan CJ, Eddyani M, Affolabi D, Phanzu DM, Eyangoh S, Jordaens  
610 K, Portaels F, Mangas K, Seemann T, Marsollier L, Marion E, Chauty A, Landier J,  
611 Fontanet A, Leirs H, Stinear TP, Jong D, C B. 2017. Multiple Introductions and Recent  
612 Spread of the Emerging Human Pathogen *Mycobacterium ulcerans* across Africa. Genome  
613 Biol Evol 9:414–426.
- 614 32. Sandgren A, Strong M, Muthukrishnan P, Weiner BK, Church GM, Murray MB. 2009.  
615 Tuberculosis Drug Resistance Mutation Database. PLOS Med 6:e1000002.
- 616 33. Nguyen D, Brassard P, Westley J, Thibert L, Proulx M, Henry K, Schwartzman K, Menzies  
617 D, Behr MA. 2003. Widespread Pyrazinamide-Resistant *Mycobacterium tuberculosis*  
618 Family in a Low-Incidence Setting. J Clin Microbiol 41:2878–2883.
- 619 34. Nguyen D, Brassard P, Menzies D, Thibert L, Warren R, Mostowy S, Behr M. 2004.  
620 Genomic Characterization of an Endemic *Mycobacterium tuberculosis* Strain: Evolutionary  
621 and Epidemiologic Implications. J Clin Microbiol 42:2573–2580.
- 622 35. Brassard P, Henry KA, Schwartzman K, Jomphe M, Olson SH. 2008. Geography and  
623 genealogy of the human host harbouring a distinctive drug-resistant strain of tuberculosis.  
624 Infect Genet Evol 8:247–257.



- 625 36. Okamoto S, Tamaru A, Nakajima C, Nishimura K, Tanaka Y, Tokuyama S, Suzuki Y, Ochi  
626 K. 2007. Loss of a conserved 7-methylguanosine modification in 16S rRNA confers low-  
627 level streptomycin resistance in bacteria. *Mol Microbiol* 63:1096–1106.
- 628 37. Spies FS, Ribeiro AW, Ramos DF, Ribeiro MO, Martin A, Palomino JC, Rossetti MLR,  
629 Silva PEA da, Zaha A. 2011. Streptomycin Resistance and Lineage-Specific  
630 Polymorphisms in *Mycobacterium tuberculosis* gidB Gene. *J Clin Microbiol* 49:2625–2630.
- 631 38. Feuerriegel S, Oberhauser B, George AG, Dafaie F, Richter E, Rüscher-Gerdes S, Niemann  
632 S. 2012. Sequence analysis for detection of first-line drug resistance in *Mycobacterium*  
633 *tuberculosis* strains from a high-incidence setting. *BMC Microbiol* 12:90.
- 634 39. Jagielski T, Ignatowska H, Bakuła Z, Dziewit Ł, Napiórkowska A, Augustynowicz-Kopeć E,  
635 Zwolska Z, Bielecki J. 2014. Screening for Streptomycin Resistance-Confering Mutations  
636 in *Mycobacterium tuberculosis* Clinical Isolates from Poland. *PLOS ONE* 9:e100078.
- 637 40. Homolka S, Meyer CG, Hillemann D, Owusu-Dabo E, Adjei O, Horstmann RD, Browne  
638 ENL, Chinbuah A, Osei I, Gyapong J, Kubica T, Ruesch-Gerdes S, Niemann S. 2010.  
639 Unequal distribution of resistance-conferring mutations among *Mycobacterium tuberculosis*  
640 and *Mycobacterium africanum* strains from Ghana. *Int J Med Microbiol* 300:489–495.
- 641 41. Fenner L, Egger M, Bodmer T, Altpeter E, Zwahlen M, Jaton K, Pfyffer GE, Borrell S,  
642 Dubuis O, Bruderer T, Siegrist HH, Furrer H, Calmy A, Fehr J, Stalder JM, Ninet B, Böttger  
643 EC, Gagneux S, Group for the SHCS and the SME of TS. 2012. Effect of Mutation and  
644 Genetic Background on Drug Resistance in *Mycobacterium tuberculosis*. *Antimicrob*  
645 *Agents Chemother* 56:3047–3053.
- 646 42. Wengenack NL, Uhl JR, Amand S, L A, Tomlinson AJ, Benson LM, Naylor S, Kline BC,  
647 Cockerill FR, Rusnak F. 1997. Recombinant *Mycobacterium tuberculosis* KatG(S315T) Is a  
648 Competent Catalase-Peroxidase with Reduced Activity toward Isoniazid. *J Infect Dis*  
649 176:722–727.
- 650 43. Pym AS, Saint-Joanis B, Cole ST. 2002. Effect of katG Mutations on the Virulence of  
651 *Mycobacterium tuberculosis* and the Implication for Transmission in Humans. *Infect Immun*  
652 70:4955–4960.
- 653 44. Spies FS, von Groll A, Ribeiro AW, Ramos DF, Ribeiro MO, Dalla Costa ER, Martin A,  
654 Palomino JC, Rossetti ML, Zaha A, da Silva PEA. 2013. Biological cost in *Mycobacterium*  
655 *tuberculosis* with mutations in the rpsL, rrs, rpoB, and katG genes. *Tuberculosis* 93:150–  
656 154.
- 657 45. Manson AL, Cohen KA, Abeel T, Desjardins CA, Armstrong DT, Barry Iii CE, Brand J,  
658 TBResist Global Genome Consortium, Chapman SB, Cho S-N, Gabrielian A, Gomez J,  
659 Jodals AM, Joloba M, Jureen P, Lee JS, Malinga L, Maiga M, Nordenberg D, Noroc E,  
660 Romancenco E, Salazar A, Ssengooba W, Velayati AA, Winglee K, Zalutskaya A, Via LE,  
661 Cassell GH, Dorman SE, Ellner J, Farnia P, Galagan JE, Rosenthal A, Crudu V,  
662 Homorodean D, Hsueh P-R, Narayanan S, Pym AS, Skrahina A, Swaminathan S, Van der  
663 Walt M, Alland D, Bishai WR, Cohen T, Hoffner S, Birren BW, Earl AM. 2017. Genomic  
664 analysis of globally diverse *Mycobacterium tuberculosis* strains provides insights into the  
665 emergence and spread of multidrug resistance. *Nat Genet* advance online publication.

- 666 46. Billington OJ, McHugh TD, Gillespie SH. 1999. Physiological Cost of Rifampin Resistance  
667 Induced In Vitro in Mycobacterium tuberculosis. *Antimicrob Agents Chemother* 43:1866–  
668 1869.
- 669 47. Eilertson B, Maruri F, Blackman A, Herrera M, Samuels DC, Sterling TR. 2014. High  
670 Proportion of Heteroresistance in gyrA and gyrB in Fluoroquinolone-Resistant  
671 Mycobacterium tuberculosis Clinical Isolates. *Antimicrob Agents Chemother* 58:3270–  
672 3275.
- 673 48. Hazbón MH, Valle MB del, Guerrero MI, Varma-Basil M, Filliol I, Cavatore M, Colangeli R,  
674 Safi H, Billman-Jacobe H, Lavender C, Fyfe J, García-García L, Davidow A, Brimacombe  
675 M, León CI, Porras T, Bose M, Chaves F, Eisenach KD, Sifuentes-Osornio J, León AP de,  
676 Cave MD, Alland D. 2005. Role of embB Codon 306 Mutations in Mycobacterium  
677 tuberculosis Revisited: a Novel Association with Broad Drug Resistance and IS6110  
678 Clustering Rather than Ethambutol Resistance. *Antimicrob Agents Chemother* 49:3794–  
679 3802.
- 680 49. DeJesus MA, Gerrick ER, Xu W, Park SW, Long JE, Boutte CC, Rubin EJ, Schnappinger  
681 D, Ehrt S, Fortune SM, Sasseti CM, Iøerger TR. 2017. Comprehensive Essentiality  
682 Analysis of the Mycobacterium tuberculosis Genome via Saturating Transposon  
683 Mutagenesis. *mBio* 8:e02133-16.
- 684 50. Shekar S, Yeo ZX, Wong JCL, Chan MKL, Ong DCT, Tongyoo P, Wong S-Y, Lee ASG.  
685 2014. Detecting Novel Genetic Variants Associated with Isoniazid-Resistant  
686 Mycobacterium tuberculosis. *PLOS ONE* 9:e102383.
- 687 51. Danilchanka O, Mailaender C, Niederweis M. 2008. Identification of a Novel Multidrug  
688 Efflux Pump of Mycobacterium tuberculosis. *Antimicrob Agents Chemother* 52:2503–2511.
- 689 52. Fu LM, Shinnick TM. 2007. Genome-wide exploration of the drug action of capreomycin on  
690 Mycobacterium tuberculosis using Affymetrix oligonucleotide GeneChips. *J Infect* 54:277–  
691 284.
- 692 53. Phong TQ, Ha DTT, Volker U, Hammer E. 2015. Using a Label Free Quantitative  
693 Proteomics Approach to Identify Changes in Protein Abundance in Multidrug-Resistant  
694 Mycobacterium tuberculosis. *Indian J Microbiol* 55:219–230.
- 695 54. Phelan J, Coll F, McNerney R, Ascher DB, Pires DEV, Furnham N, Coeck N, Hill-  
696 Cawthorne GA, Nair MB, Mallard K, Ramsay A, Campino S, Hibberd ML, Pain A, Rigouts  
697 L, Clark TG. 2016. Mycobacterium tuberculosis whole genome sequencing and protein  
698 structure modelling provides insights into anti-tuberculosis drug resistance. *BMC Med*  
699 14:31.
- 700 55. Andrews S. 2012. FastQC.
- 701 56. Kreuger F. 2013. TrimGalore!
- 702 57. Li H. 2013. Aligning sequence reads, clone sequences and assembly contigs with BWA-  
703 MEM. ArXiv13033997 Q-Bio.



- 704 58. Li H, Handsaker B, Wysoker A, Fennell T, Ruan J, Homer N, Marth G, Abecasis G, Durbin  
705 R. 2009. The Sequence Alignment/Map format and SAMtools. *Bioinformatics* 25:2078–  
706 2079.
- 707 59. Walker BJ, Abeel T, Shea T, Priest M, Abouelliel A, Sakthikumar S, Cuomo CA, Zeng Q,  
708 Wortman J, Young SK, Earl AM. 2014. Pilon: An Integrated Tool for Comprehensive  
709 Microbial Variant Detection and Genome Assembly Improvement. *PLOS ONE* 9:e112963.
- 710 60. Price MN, Dehal PS, Arkin AP. 2010. FastTree 2 – Approximately Maximum-Likelihood  
711 Trees for Large Alignments. *PLOS ONE* 5:e9490.
- 712 61. Page AJ, Taylor B, Delaney AJ, Soares J, Seemann T, Keane JA, Harris SR. 2016. SNP-  
713 sites: rapid efficient extraction of SNPs from multi-FASTA alignments. *bioRxiv*;038190v1.
- 714 62. Cingolani P, Platts A, Wang LL, Coon M, Nguyen T, Wang L, Land SJ, Lu X, Ruden DM.  
715 2012. A program for annotating and predicting the effects of single nucleotide  
716 polymorphisms, SnpEff. *Fly (Austin)* 6:80–92.
- 717 63. Salazar A, Earl A, Desjardins C, Abeel T. 2015. Normalizing alternate representations of  
718 large sequence variants across multiple bacterial genomes. *BMC Bioinformatics* 16:A8.
- 719 64. De Mita S, Siol M. 2012. EggLib: processing, analysis and simulation tools for population  
720 genetics and genomics. *BMC Genet* 13:27.
- 721 65. R Core Team. 2015. R: A Language and Environment for Statistical Computing. R  
722 Foundation for Statistical Computing, Vienna, Austria.
- 723 66. Weir BS, Cockerham CC. 1984. Estimating F-Statistics for the Analysis of Population  
724 Structure. *Evolution* 38:1358–1370.
- 725 67. Sagulenko P, Puller V, Neher R. 2017. TreeTime: maximum likelihood phylodynamic  
726 analysis. *bioRxiv* 153494.
- 727  
728

729 **Table 1. Frequency of resistance in data set.** AMI- amikacin, CAP- capreomycin,  
730 EMB- ethambutol, Et- ethionamide, INH- isoniazid, K- kanamycin, MOX- moxifloxacin,  
731 OFL- ofloxacin, PRO- protionamide, PZA- pyrazinamide, RIF- rifampin, STR-  
732 streptomycin.

| <b>Drug</b> | <b>Resistant</b> | <b>Susceptible</b> | <b>Unknown</b> |
|-------------|------------------|--------------------|----------------|
| <b>INH</b>  | 0.59             | 0.33               | 0.08           |
| <b>STR</b>  | 0.53             | 0.39               | 0.07           |
| <b>RIF</b>  | 0.50             | 0.43               | 0.07           |
| <b>EMB</b>  | 0.30             | 0.59               | 0.11           |
| <b>PZA</b>  | 0.21             | 0.67               | 0.12           |
| <b>OFL</b>  | 0.16             | 0.39               | 0.45           |
| <b>PRO</b>  | 0.15             | 0.22               | 0.62           |
| <b>CAP</b>  | 0.10             | 0.41               | 0.49           |
| <b>MOX</b>  | 0.09             | 0.41               | 0.49           |
| <b>Et</b>   | 0.06             | 0.07               | 0.88           |
| <b>AMI</b>  | 0.05             | 0.34               | 0.61           |
| <b>K</b>    | 0.05             | 0.12               | 0.83           |

733

734

735 **Table 2. Signatures of selection in known drug resistance genes.** The number of  
 736 distinct entries in the TB Drug Resistance Mutation Database for each gene is reported  
 737 in TB Dream column.  $\pi$  and  $\theta$  are the percentiles for each diversity value, respectively.  
 738 TD is the percentile of the residual after linear regression of Tajima's D with gene  
 739 length. Genes with homoplastic SNPs are indicated with 'Y' in the Homoplasmy column. If  
 740 a homoplastic SNP was also an  $F_{ST}$  outlier, it is indicated with a 'Y' in the  $F_{ST}$  column.  
 741 Genes are classified as tight, sloppy, or hybrid targets of selection based on diversity,  
 742 homoplasmy, and  $F_{ST}$  results. (IG) indicates an intergenic SNP.

| Gene          | Rv Number      | Drug        | TB Dream | $\pi$ | $\theta$ | TD   | Homoplasmy | $F_{ST}$ | Type                  |
|---------------|----------------|-------------|----------|-------|----------|------|------------|----------|-----------------------|
| <i>katG</i>   | <i>Rv1908c</i> | INH         | 226      | 0.80  | 0.82     | 0.34 | Y          | Y        | tight                 |
| <i>pncA</i>   | <i>Rv2043c</i> | PZA         | 195      | 0.97  | 1.00     | 0.00 | Y          | N        | sloppy                |
| <i>embB</i>   | <i>Rv3795</i>  | EMB         | 117      | 0.77  | 0.89     | 0.08 | Y          | Y        | hybrid                |
| <i>ahpC</i>   | <i>Rv2428</i>  | INH         | 31       | 0.20  | 0.21     | 0.61 | Y          | N        | -                     |
| <i>tlyA</i>   | <i>Rv1694</i>  | CAP         | 28       | 0.37  | 0.89     | 0.06 | N          | N        | -                     |
| <i>embC</i>   | <i>Rv3793</i>  | EMB         | 28       | 0.59  | 0.74     | 0.01 | N          | N        | -                     |
| <i>embR</i>   | <i>Rv1267c</i> | EMB         | 25       | 0.46  | 0.49     | 0.28 | N          | N        | -                     |
| <i>rrs</i>    | <i>Rvnr01</i>  | STR, K, CAP | 24       | 0.89  | 1.00     | 0.08 | N          | N        | -                     |
| <i>ethA</i>   | <i>Rv3854c</i> | Et          | 23       | 0.72  | 1.00     | 0.00 | Y          | Y (IG)   | sloppy,<br>tight (IG) |
| <i>gid</i>    | <i>Rv3919c</i> | STR         | 22       | 1.00  | 1.00     | 0.07 | Y          | N        | sloppy                |
| <i>gyrB</i>   | <i>Rv0005</i>  | MOX, OFL    | 15       | 0.58  | 0.91     | 0.00 | Y          | N        | -                     |
| <i>fabG1</i>  | <i>Rv1483</i>  | INH, Et     | 13       | 0.60  | 0.66     | 0.30 | Y          | Y (IG)   | tight                 |
| <i>inhA</i>   | <i>Rv1484</i>  | INH, Et     | 13       | 0.56  | 0.59     | 0.32 | Y          | N        | -                     |
| <i>rpsL</i>   | <i>Rv0682</i>  | STR         | 13       | 0.99  | 0.95     | 0.80 | Y          | Y        | hybrid                |
| <i>gyrA</i>   | <i>Rv0006</i>  | MOX, OFL    | 12       | 0.81  | 0.94     | 0.10 | Y          | Y        | tight                 |
| <i>embA</i>   | <i>Rv3794</i>  | EMB         | 11       | 0.77  | 0.38     | 0.79 | N          | N        | -                     |
| <i>kasA</i>   | <i>Rv2245</i>  | INH         | 7        | 0.73  | 0.18     | 0.86 | N          | N        | -                     |
| <i>ndh</i>    | <i>Rv1854c</i> | INH         | 5        | 0.57  | 0.52     | 0.28 | N          | N        | -                     |
| <i>iniA</i>   | <i>Rv0342</i>  | EMB, INH    | 4        | 0.64  | 0.33     | 0.56 | N          | N        | -                     |
| <i>Rv0340</i> | <i>Rv0340</i>  | INH         | 3        | 0.89  | 0.88     | 0.57 | N          | N        | -                     |
| <i>iniB</i>   | <i>Rv0341</i>  | EMB, INH    | 3        | 0.07  | 0.07     | 0.79 | N          | N        | -                     |
| <i>fbpC</i>   | <i>Rv0129c</i> | INH         | 3        | 0.78  | 0.19     | 0.89 | N          | N        | -                     |
| <i>rmlD</i>   | <i>Rv3266c</i> | EMB         | 2        | 0.75  | 0.36     | 0.75 | N          | N        | -                     |
| <i>iniC</i>   | <i>Rv0343</i>  | EMB, INH    | 2        | 0.49  | 0.67     | 0.08 | N          | N        | -                     |
| <i>thyA</i>   | <i>Rv2764c</i> | PAS         | 2        | 0.84  | 0.94     | 0.28 | N          | N        | -                     |
| <i>nat</i>    | <i>Rv3566c</i> | INH         | 2        | 0.76  | 0.55     | 0.63 | N          | N        | -                     |
| <i>accD6</i>  | <i>Rv2247</i>  | INH         | 1        | 0.90  | 0.63     | 0.90 | N          | N        | -                     |
| <i>furA</i>   | <i>Rv1909c</i> | INH         | 1        | 0.80  | 0.63     | 0.62 | N          | N        | -                     |
| <i>Rv1772</i> | <i>Rv1772</i>  | INH         | 1        | 0.50  | 0.35     | 0.54 | N          | N        | -                     |
| <i>fabD</i>   | <i>Rv2243</i>  | INH         | 1        | 0.26  | 0.28     | 0.54 | N          | N        | -                     |
| <i>fadE24</i> | <i>Rv3139</i>  | INH         | 1        | 0.36  | 0.58     | 0.12 | N          | N        | -                     |
| <i>rpoB</i>   | <i>Rv0667</i>  | RIF         | 1        | 0.82  | 0.92     | 0.18 | Y          | Y        | hybrid                |
| <i>efpA</i>   | <i>Rv2846c</i> | INH         | 1        | 0.10  | 0.11     | 0.65 | N          | N        | -                     |

|               |                |     |   |      |      |      |   |   |   |
|---------------|----------------|-----|---|------|------|------|---|---|---|
| <i>ethR</i>   | <i>Rv3855</i>  | Et  | - | 0.58 | 0.77 | 0.22 | N | N | - |
| <i>Rv0678</i> | <i>Rv0678</i>  | BDQ | - | 0.37 | 0.72 | 0.25 | N | N | - |
| <i>eis</i>    | <i>Rv2416c</i> | K   | - | 0.51 | 0.28 | 0.54 | N | N | - |
| <i>mshA</i>   | <i>Rv0486</i>  | Et  | - | 0.86 | 0.48 | 0.87 | N | N | - |
| <i>rpsA</i>   | <i>Rv1630</i>  | PZA | - | 0.88 | 0.62 | 0.84 | N | N | - |
| <i>folC</i>   | <i>Rv2447c</i> | PAS | - | 0.66 | 0.78 | 0.11 | Y | N | - |
| <i>rplC</i>   | <i>Rv0701</i>  | LZD | - | 0.57 | 0.77 | 0.21 | N | N | - |

---

744  
745  
746

**Table 3. Homoplastic  $F_{ST}$  outliers.** Weir and Cockerham's  $F_{ST}$  (wcFst) values in the top 1% of values genome wide are reported for each drug. For intergenic SNPs, the closest gene is listed. We identified mutations in genes previously associated with drug resistance (Known = Y) and novel putative resistance or compensatory mutations (Known = N).

| Location | Gene           | Type       | AMI  | CAP  | EMB  | Et   | INH  | K    | MOX  | OFL  | PRO  | PZA  | RIF  | STR  | Known | Lineage |
|----------|----------------|------------|------|------|------|------|------|------|------|------|------|------|------|------|-------|---------|
| 1821     | <i>dnaN</i>    | intergenic | -    | -    | -    | 0.43 | -    | 0.57 | -    | 0.10 | -    | -    | -    | -    | N     | all     |
| 7570     | <i>gyrA</i>    | missense   | -    | 0.33 | 0.11 | 0.46 | -    | 0.66 | -    | 0.29 | -    | 0.18 | -    | -    | Y     | all     |
| 7572     | <i>gyrA</i>    | missense   | -    | -    | -    | -    | -    | -    | 0.06 | -    | -    | -    | -    | -    | Y     | all     |
| 7581     | <i>gyrA</i>    | missense   | -    | -    | -    | -    | -    | -    | 0.07 | -    | -    | -    | -    | -    | Y     | all     |
| 7582     | <i>gyrA</i>    | missense   | -    | -    | -    | -    | -    | -    | 0.35 | 0.22 | -    | -    | -    | -    | Y     | all     |
| 75233    | <i>icd2</i>    | intergenic | -    | -    | -    | -    | -    | -    | 0.05 | -    | -    | -    | -    | -    | N     | all     |
| 94388    | <i>hycQ</i>    | synonymous | -    | -    | 0.07 | -    | 0.12 | -    | -    | -    | -    | -    | 0.12 | 0.13 | N     | all     |
| 230170   | <i>Rv0194</i>  | missense   | -    | -    | -    | -    | 0.12 | -    | 0.05 | -    | -    | -    | 0.12 | 0.13 | N     | all     |
| 332916   | <i>vapC25</i>  | missense   | -    | -    | 0.10 | -    | -    | -    | -    | 0.09 | -    | 0.20 | -    | -    | N     | all     |
| 761155   | <i>rpoB</i>    | missense   | -    | -    | 0.31 | -    | 0.58 | -    | -    | -    | -    | 0.10 | 0.72 | 0.41 | Y     | all     |
| 761161   | <i>rpoB</i>    | missense   | -    | 0.33 | 0.09 | 0.51 | -    | 0.71 | -    | 0.13 | -    | 0.16 | -    | -    | Y     | all     |
| 764817   | <i>rpoC</i>    | missense   | 0.19 | -    | -    | -    | -    | -    | -    | -    | -    | -    | -    | -    | N     | all     |
| 781687   | <i>rpsL</i>    | missense   | -    | -    | 0.10 | -    | 0.32 | -    | -    | -    | -    | 0.15 | -    | 0.37 | Y     | all     |
| 922004   | <i>Rv0830</i>  | missense   | -    | 0.30 | 0.12 | 0.43 | -    | -    | -    | 0.10 | -    | 0.21 | -    | -    | N     | all     |
| 1076880  | <i>Rv0965c</i> | synonymous | -    | -    | -    | -    | 0.12 | -    | -    | -    | -    | -    | 0.12 | 0.13 | N     | all     |
| 1673425  | <i>fabG1</i>   | intergenic | -    | -    | -    | -    | -    | -    | -    | -    | 0.11 | -    | -    | -    | Y     | all     |
| 1673432  | <i>fabG1</i>   | intergenic | -    | -    | -    | 0.52 | -    | 0.65 | -    | -    | -    | -    | -    | -    | Y     | all     |
| 1722228  | <i>pks5</i>    | missense   | -    | -    | 0.08 | -    | 0.28 | -    | -    | 0.07 | -    | 0.17 | -    | 0.26 | N     | all     |
| 2122395  | <i>lldD2</i>   | synonymous | -    | -    | -    | -    | -    | -    | 0.06 | -    | -    | -    | -    | -    | N     | all     |
| 2155168  | <i>katG</i>    | missense   | -    | -    | 0.36 | -    | 0.89 | -    | -    | 0.13 | -    | 0.32 | 0.60 | 0.66 | Y     | all     |
| 2174216  | <i>Rv1922</i>  | synonymous | -    | -    | -    | -    | -    | -    | -    | -    | -    | 0.08 | -    | -    | N     | all     |
| 2207525  | <i>Rv1958c</i> | intergenic | -    | -    | -    | -    | -    | -    | -    | -    | -    | 0.09 | -    | -    | N     | all     |
| 2422824  | <i>Rv2161c</i> | missense   | -    | 0.30 | -    | 0.43 | -    | 0.57 | -    | 0.10 | -    | -    | -    | -    | N     | all     |
| 2660319  | <i>mbtF</i>    | missense   | -    | -    | 0.06 | -    | -    | -    | -    | -    | -    | -    | -    | -    | N     | all     |
| 2715369  | <i>Rv3413c</i> | intergenic | 0.17 | -    | 0.09 | -    | 0.28 | -    | -    | -    | -    | -    | 0.30 | 0.13 | N     | all     |
| 2866647  | <i>lppA</i>    | synonymous | -    | -    | -    | -    | 0.12 | -    | 0.07 | -    | -    | -    | -    | -    | N     | all     |

|         |                |            |      |      |      |      |      |   |      |      |      |      |      |      |   |     |
|---------|----------------|------------|------|------|------|------|------|---|------|------|------|------|------|------|---|-----|
| 2867298 | <i>lppB</i>    | synonymous | -    | -    | -    | -    | 0.13 | - | -    | -    | -    | -    | -    | -    | N | all |
| 2867347 | <i>lppB</i>    | synonymous | -    | -    | -    | -    | 0.13 | - | 0.06 | -    | -    | -    | 0.12 | 0.14 | N | all |
| 2867756 | <i>lppB</i>    | synonymous | -    | -    | -    | -    | 0.14 | - | -    | -    | -    | -    | -    | -    | N | all |
| 3500149 | <i>Rv3134c</i> | synonymous | -    | -    | -    | -    | -    | - | -    | -    | -    | -    | 0.11 | -    | N | all |
| 3550789 | <i>Rv3183</i>  | synonymous | -    | -    | -    | -    | -    | - | -    | -    | -    | -    | 0.12 | 0.13 | N | all |
| 3680932 | <i>lhr</i>     | synonymous | -    | -    | -    | -    | 0.12 | - | -    | -    | -    | -    | 0.12 | 0.13 | N | all |
| 4001622 | <i>fadA6</i>   | intergenic | -    | -    | -    | -    | -    | - | -    | -    | -    | -    | 0.11 | -    | N | all |
| 4247429 | <i>embB</i>    | missense   | -    | -    | 0.25 | 0.45 | 0.23 | - | 0.05 | 0.11 | -    | 0.31 | 0.21 | 0.20 | Y | all |
| 4247574 | <i>embB</i>    | synonymous | 0.19 | -    | 0.07 | -    | 0.27 | - | -    | -    | -    | -    | 0.30 | -    | Y | all |
| 4327480 | <i>ethA</i>    | intergenic | 0.20 | -    | 0.07 | -    | 0.27 | - | -    | -    | -    | -    | 0.30 | -    | Y | all |
| 764948  | <i>rpoC</i>    | missense   | -    | -    | -    | -    | -    | - | -    | -    | 0.06 | -    | -    | -    | Y | L2  |
| 4248003 | <i>embB</i>    | missense   | -    | 0.16 | -    | -    | -    | - | -    | -    | -    | -    | -    | -    | Y | L2  |
| 698     | <i>dnaA</i>    | missense   | -    | -    | -    | -    | -    | - | -    | -    | -    | -    | -    | 0.10 | N | L4  |
| 60185   | <i>Rv0057</i>  | missense   | -    | -    | -    | -    | -    | - | -    | -    | -    | -    | -    | 0.06 | N | L4  |
| 761110  | <i>rpoB</i>    | missense   | 0.66 | -    | -    | -    | -    | - | -    | -    | -    | -    | -    | -    | Y | L4  |
| 764822  | <i>rpoC</i>    | missense   | -    | -    | -    | -    | -    | - | -    | -    | -    | -    | -    | 0.06 | Y | L4  |
| 781822  | <i>rpsL</i>    | missense   | -    | -    | -    | -    | 0.12 | - | -    | -    | -    | -    | 0.13 | 0.14 | Y | L4  |
| 2123145 | <i>lldD2</i>   | missense   | -    | -    | -    | -    | -    | - | -    | -    | -    | -    | -    | 0.06 | N | L4  |
| 2372550 | <i>dop</i>     | missense   | 0.64 | -    | -    | -    | -    | - | -    | -    | -    | -    | -    | -    | N | L4  |
| 2715344 | <i>Rv2413c</i> | intergenic | -    | -    | -    | -    | -    | - | -    | -    | -    | -    | -    | 0.06 | N | L4  |
| 2986827 | <i>Rv2670c</i> | missense   | -    | -    | -    | -    | 0.16 | - | -    | -    | -    | -    | 0.17 | 0.15 | N | L4  |
| 4247431 | <i>embB</i>    | missense   | -    | -    | -    | -    | 0.11 | - | -    | -    | -    | -    | 0.11 | 0.07 | Y | L4  |
| 4248003 | <i>embB</i>    | missense   | -    | -    | -    | -    | -    | - | -    | -    | -    | -    | -    | 0.06 | Y | L4  |

747

748

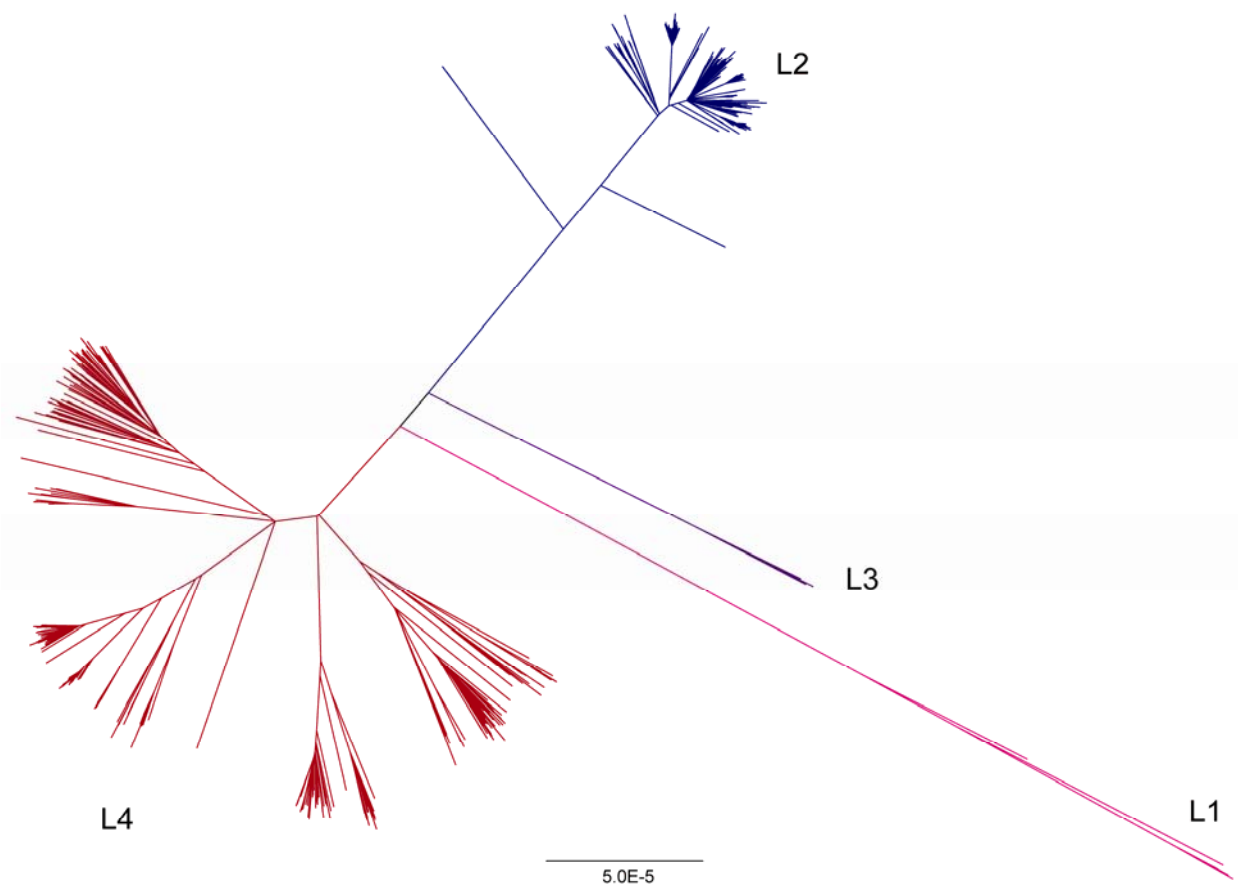

749

750 **Figure 1. Phylogeny of *Mycobacterium tuberculosis* sample.** The phylogeny was  
751 inferred using FastTree (60). Lineages are colored as follows: lineage 1 (L1) - pink,  
752 lineage 2 (L2) - blue, lineage 3 (L3) - purple, lineage 4 (L4) - red. Lineage 4 is  
753 associated with deeper branching sub-lineages in comparison with lineage 2.

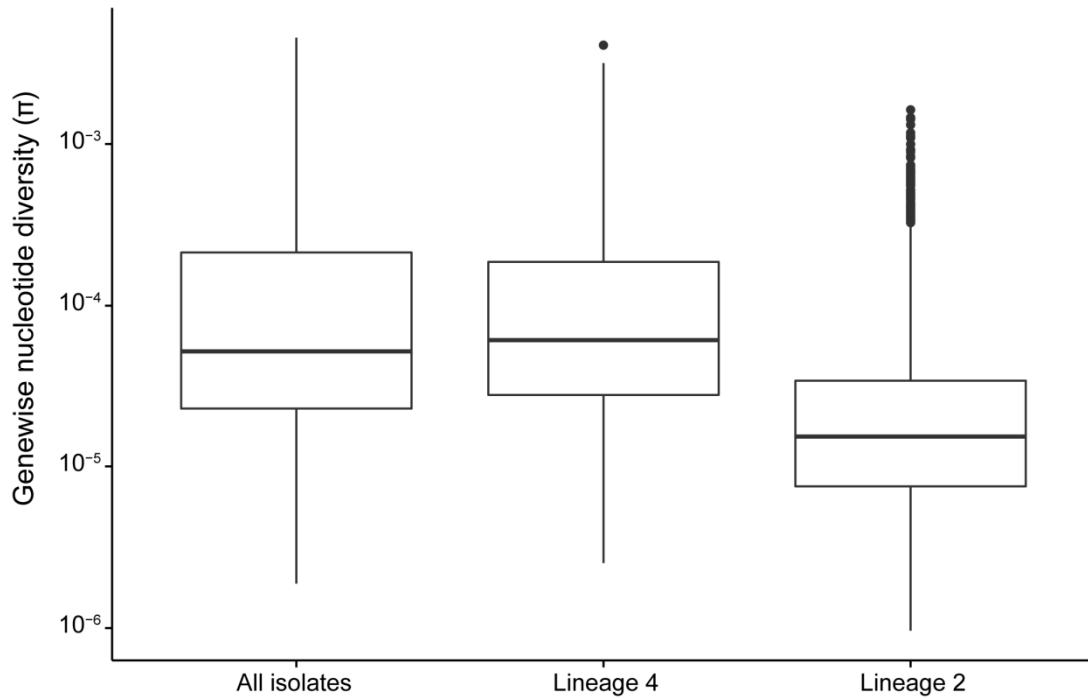

754

755 **Figure 2. Distributions of gene-wise nucleotide diversity for all isolates, as well as**  
756 **lineages 4 and 2 considered separately.** Repetitive regions of the alignment were  
757 masked. Sites were included in estimation of  $\pi$  if 95% of isolates in the alignment had a  
758 valid nucleotide at the position. We used Egglip to calculate statistics (64). Nucleotide  
759 diversity is lower in lineage 2 compared to lineage 4 (Welch Two Sample t-test,  $p < 2.2$   
760  $\times 10^{-16}$ )

761



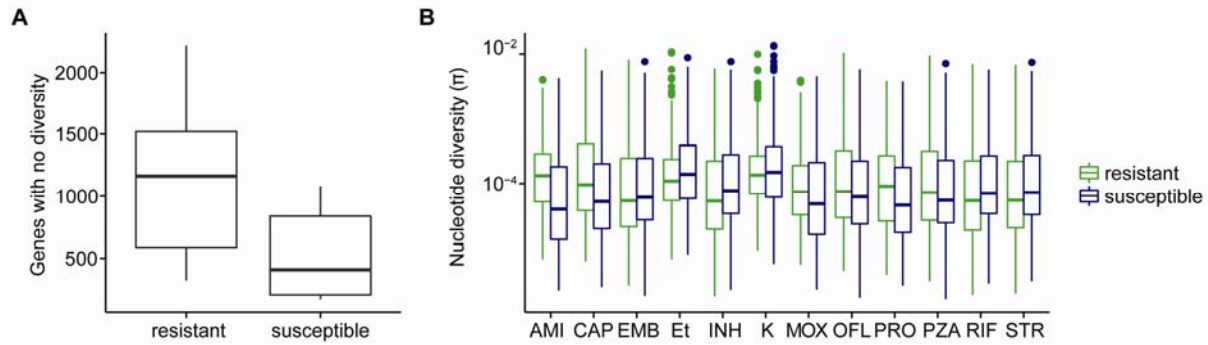

762  
763 **Figure 3. Diversity of resistant and susceptible isolates.** A) Counts of genes with no  
764 nucleotide diversity in resistant and susceptible subpopulations. B) Genewise nucleotide  
765 diversity (excluding invariant genes) in susceptible and resistant isolates. Among genes  
766 in which it is measurable, nucleotide diversity is similar between resistant and  
767 susceptible isolates even when drug resistance associated genes and targets of  
768 independent mutation identified by Farhat et al. 2013 are removed ( $p = 0.13$ ).

769

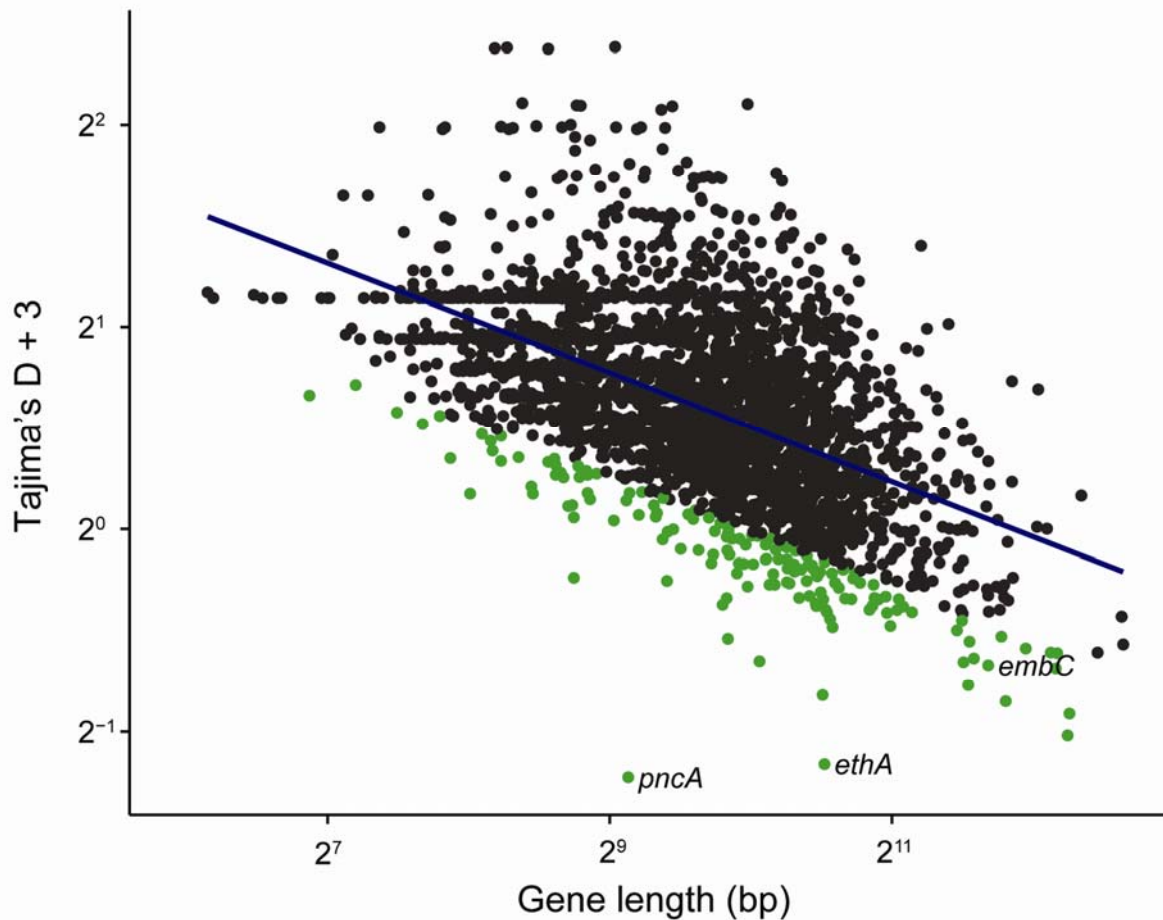

770  
771  
772  
773  
774  
775  
776  
777  
778  
779  
780

**Figure 4. Gene-wise Tajima's D and gene length.** Repetitive regions of the alignment were masked. Gene lengths have been log transformed (base 2). We added a constant value (3) to all Tajima's D values to make them positive and log transformed (base 2), as with the gene lengths. The linear regression line is plotted in blue. Genes with regression values in the lower 5% are highlighted in green. Drug resistance associated genes in this group are labelled. While negative Tajima's D is normally associated with purifying selection or a recent selective sweep, we find that drug resistance genes with negative Tajima's D also have high nucleotide diversity. We hypothesize that patterns of diversity at these genes have been affected by relaxation of purifying selection and positive selection in association with for drug resistance.

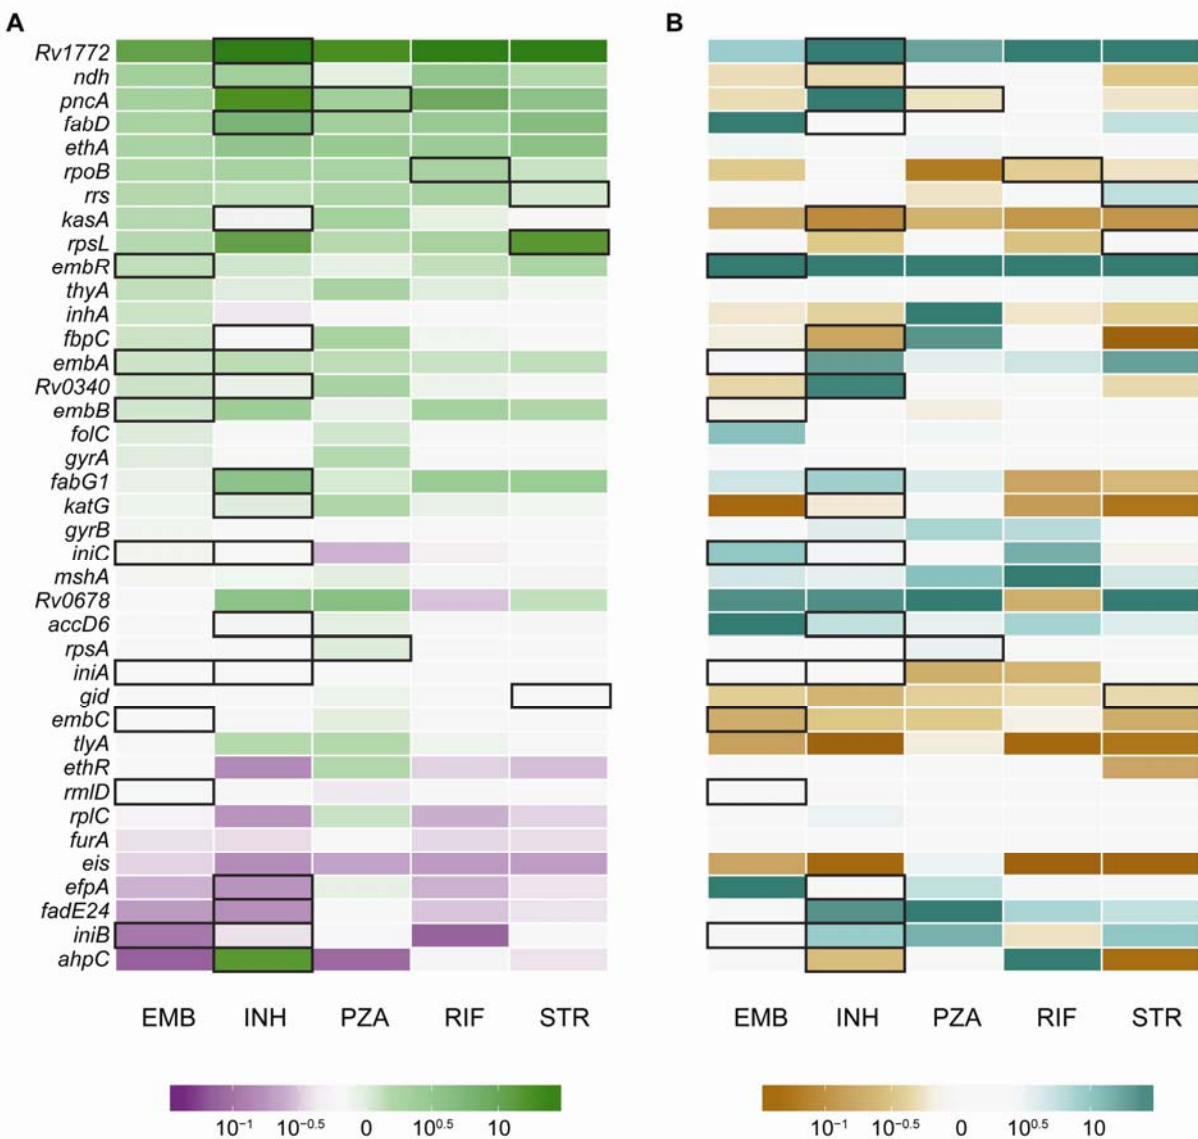

781

782 **Figure 5. Ratios of nucleotide diversity in resistance associated genes.** Genes with  
 783 zero diversity were transformed to  $1 \times 10^{-16}$  before calculating ratios. Genes with ratios  
 784 more extreme than  $10^{-1.5}$  or  $10^{1.5}$  are all filled with the deepest shade. Genes associated  
 785 with resistance to each drug are outlined in black. A) Ratio of nucleotide diversity in  
 786 resistant and susceptible isolates. Green genes are more diverse in resistant isolates,  
 787 which could be due to diversifying selection and/or relaxation of purifying selection.  
 788 Purple genes are more diverse in susceptible isolates, likely due to increased purifying  
 789 selection. White genes have similar diversity in resistant and susceptible isolates. B)  
 790 Comparison of ratios in lineage 2 and lineage 4. Teal genes are more diverse in lineage  
 791 2 resistant isolates, suggesting diversifying selection/relaxation of purifying selection  
 792 specific to this lineage. Brown genes are more diverse in lineage 4 resistant isolates.  
 793 White genes have similar diversity in lineages 2 and 4.

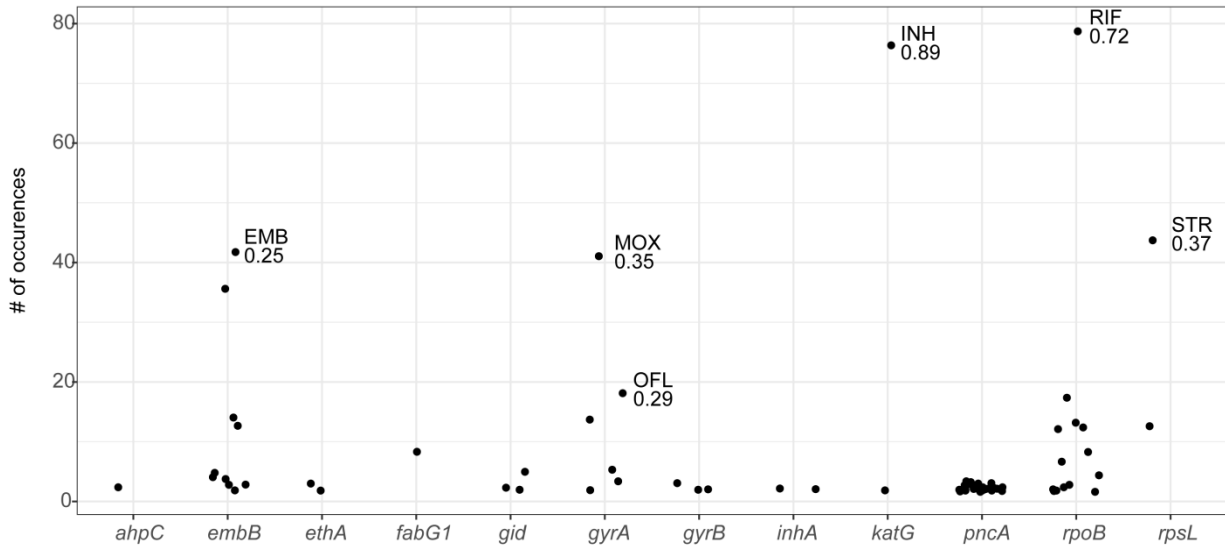

794

795

**Figure 6. Homoplastic SNPs in drug resistance associated genes.** SNPs with  $F_{ST}$  in the top 1% of genome-wide values are labeled with the population (associated drug resistance) and the  $F_{ST}$  value. *pncA* is remarkable for harboring diverse homoplastic mutations, each of which occurs relatively infrequently (“sloppy target”). *embB*, *gyrA*, *katG*, *rpoB* and *rpsL* harbor dominant mutations that occur frequently on the phylogeny and are strongly associated with resistant populations (“tight targets”).

801

802 **Supplementary Table 1.** Accession numbers and lineage designation for sequence  
803 data passing quality control filters.
